# Supplementary material for: Non-hydroxylic clathrate hosts of [4 + 2]π cycloadducts of phencyclone and N-arylmaleimides: recognition of aromatic guests
Source: Royal Society of Chemistry journal article supplement (doi:10.1039/b201915a), 2002-01-01
Supplement: b201915a.pdf [file b201915a.pdf]

# Electronic Supporting Information

## Non-hydroxylic Clathrate Hosts of [4+2] $\pi$ Cycloadducts of Phencyclone and *N*-Arylmaleimides. Recognition of Aromatic Guests

**Yasuyuki Yoshitake,<sup>a</sup> Junichi Misaka,<sup>a</sup> Koji Setoguchi,<sup>a</sup> Masaki Abe,<sup>a</sup>  
Tomohiro Kawaji,<sup>a</sup> Masashi Eto<sup>b</sup> and Kazunobu Harano<sup>a\*</sup>**

*<sup>a</sup>Faculty of Pharmaceutical Sciences, Kumamoto University, 5-1 Oe-hon-machi, Kumamoto 862-0973, Japan. School of Agriculture, <sup>b</sup>Kyushu Tokai University, 5435 Kawayo, Choyoson, Asogun, Kumamoto 869-1404, Japan*  
(E-mail: harano@gpo.kumamoto-u.ac.jp)

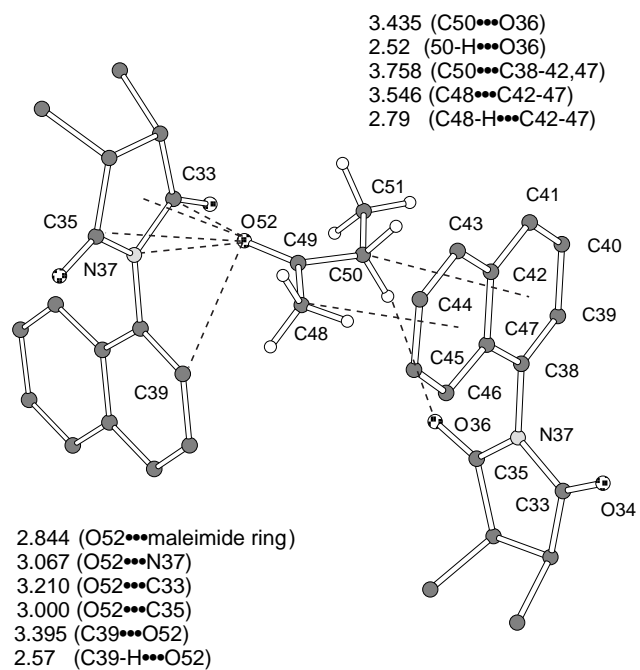

**ESI-1.** Intermolecular atom-plane and atom-atom distances (Å) of the **3c•**butanone complex

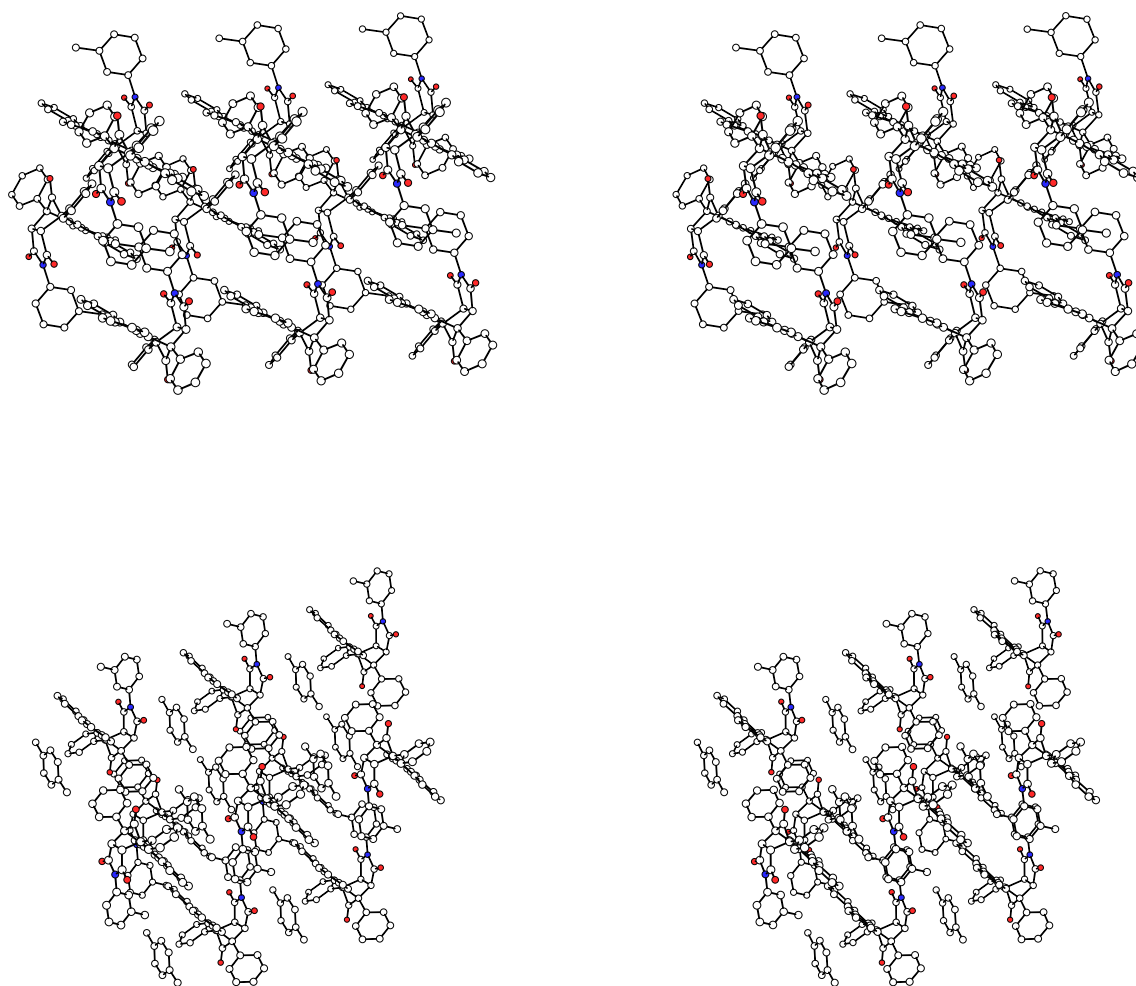

**ESI-2.** Stereo drawings of the crystal structure of the free host (**3g**) and the inclusion complex of **3g•p-xylene**.

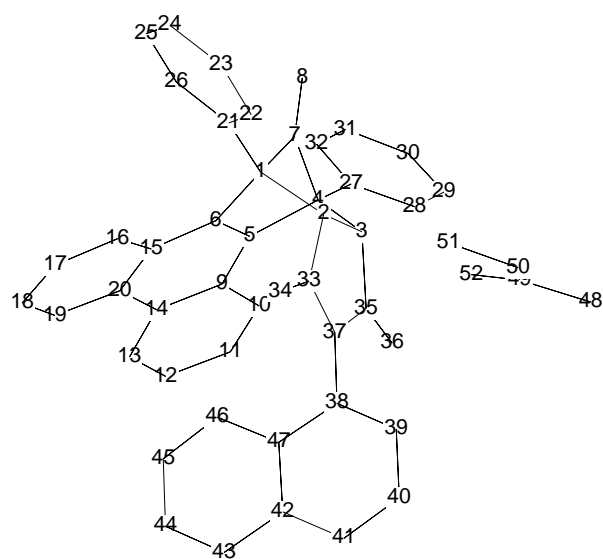

**ESI-3.** Numering sequence of **3c**•butanone

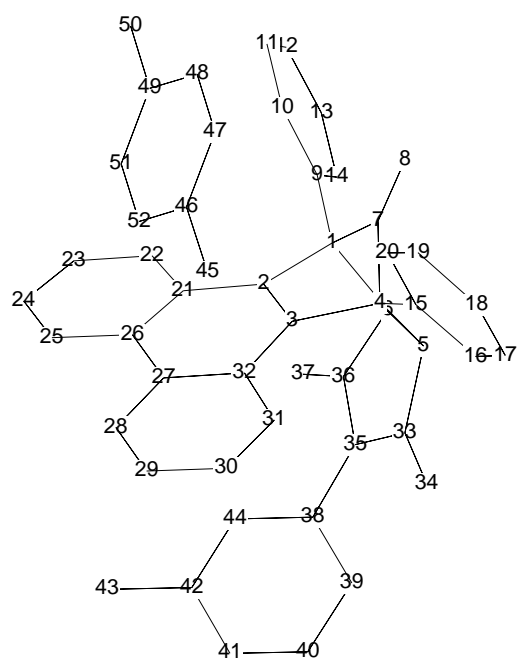

**ESI-4.** Numering sequence of of the free host (**3g**) and the inclusion complex of **3g**•*p*-xylene

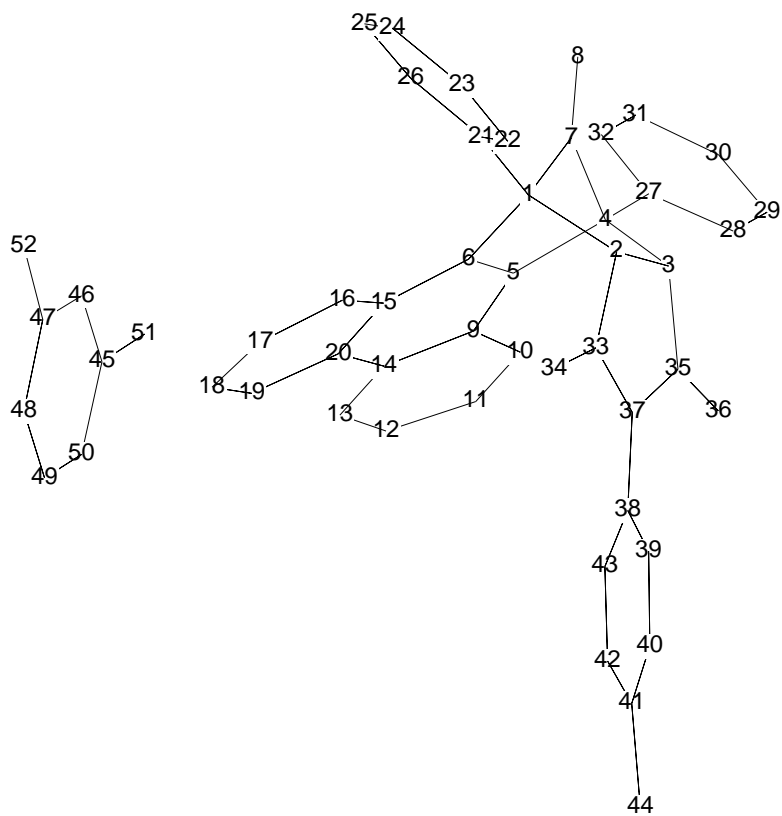

**ESI-5.** Numbering sequence of **2h•m**-xylene

X-Ray

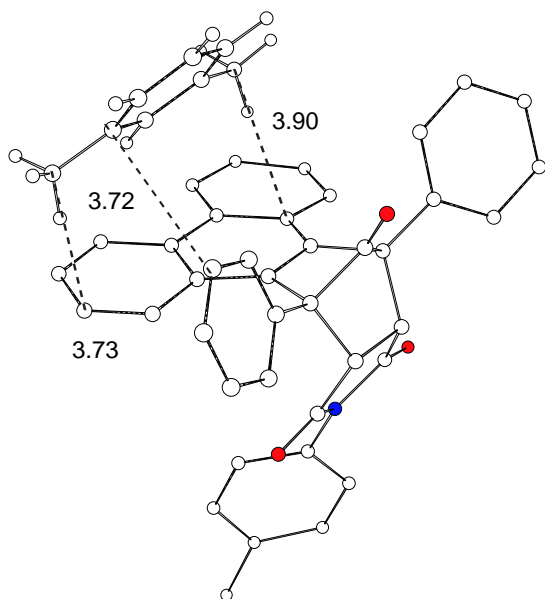

PM3

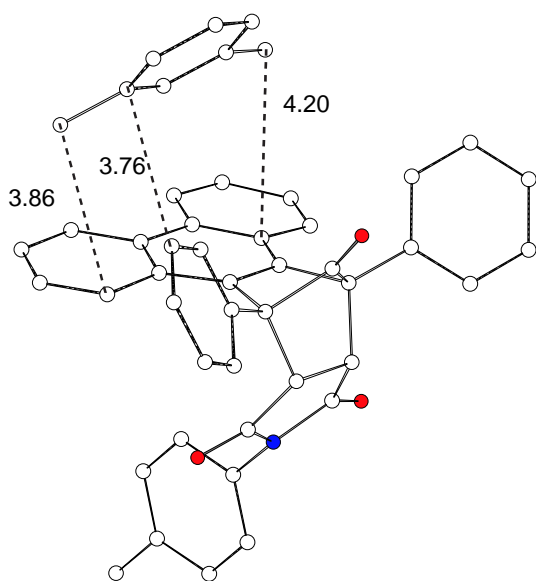

**ESI-6.** X-Ray and PM3 structures of the 1:1 complex model of m-xylene and **3h**

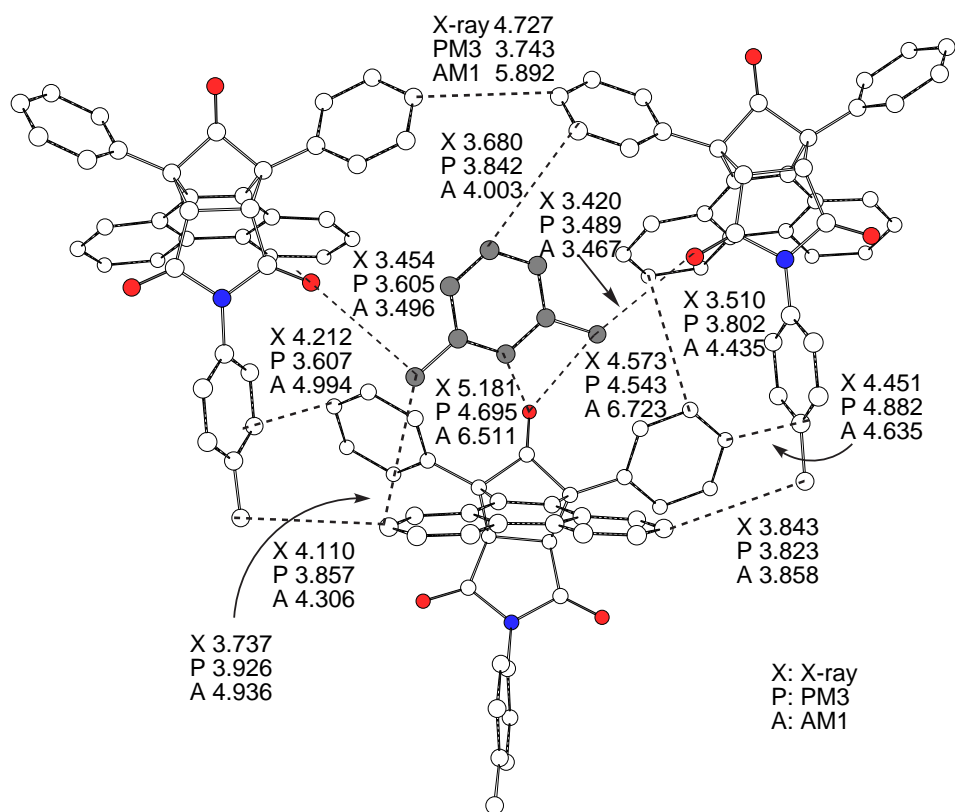

**ESI-7.** PM3-Calculated Geometry of 3:1 Complex extracted from the inclusion compound **3h** ÅEm -xylene and Comparison of the Interatomic Distance Data between the PM3- and AM1-Calculated Data and X-Ray Data



**ESI-8.** Heats of formation<sup>a</sup> for the complex formation of **3h**•*m*-xylene calculated by PM3 method

---

| compound                             | $\Delta H_f^b$   | $\Delta\Delta H_f^b$ |
|--------------------------------------|------------------|----------------------|
| <i>m</i> -xylene                     | 4.786 (6.851)    |                      |
| <b>3h</b>                            | 60.082 (100.221) |                      |
| <b>3h</b> (1 mol) + <i>m</i> -xylene | 64.868 (107.072) | 0.0                  |
| <b>3h</b> (1 mol) • <i>m</i> -xylene | 61.232 (106.999) | -3.636 (-0.073)      |

---

a) In kcal/mol. b) AM1 values in parentheses.
